# Supplementary material for: A repeated IMP-binding motif controls oskar mRNA translation and anchoring independently of Drosophila melanogaster IMP
Source: PubMed Central journal article supplement — J Cell Biol. 2006 Feb 13;172(4):577–88. doi: 10.1083/jcb.200510044 (PMC2063677; doi:10.1083/jcb.200510044), 2006-02-13
Supplement: jcellbiol_jcb.200510044_3.pdf [file jcellbiol_jcb.200510044_3.pdf]

Munro et al. <http://www.jcb.org/cgi/content/full/jcb.200510044/DC1>

## Supplemental materials and methods

### RNA protein cross-linking immunoprecipitation and RT-PCR

Ovaries were hand dissected from 50 flies, and protein was extracted using a pipette pestle in 100  $\mu$ l of extraction buffer (25 mM Hepes, pH 6.8, 50 mM KCl, 1 mM MgCl<sub>2</sub>, 1 mM DTT, 125 mM sucrose, and proteinase inhibitor cocktail [Roche]). The protein extract was then cleared by centrifugation at 12,000 rpm for 5 min, and the supernatant was transferred to a new tube before the addition of 37% formaldehyde to a final volume of 1% (vol/vol). The solution was then incubated for 10 min with slow mixing at RT. The cross-linking reaction was quenched by the addition of glycine, pH 7.0, to a final concentration of 0.25 M. The extract was then incubated with 50  $\mu$ g of anti-IMP immobilized on protein A-Sepharose and mixed for 2 h at 4°C. The Sepharose was gently spun down (1 min at 2,500 rpm) and washed five times with RIPA buffer (50 mM Tris, pH 7.5, 1% NP-40, 1% sodium decholate, 0.1% SDS, 1 mM EDTA, and 1 M NaCl). 100  $\mu$ l of extraction buffer was added and heated at 70°C for 45 min to reverse the RNA protein cross-linking. The released proteins and RNAs were removed and placed in a new tube. 300  $\mu$ l Trizol (Invitrogen) and 80  $\mu$ l of chloroform were added, mixed, incubated at RT for 10 min, and then spun at 14,000 rpm for 10 min. The aqueous phase and isopropanol ppt were collected with glycoblue (Ambion) by spinning at 14,000 rpm for 10 min and then DNase treated with DNA-free (Ambion) and resuspended in 20  $\mu$ l RNase-free water. 1  $\mu$ l of the extracted RNA was taken for RT-PCR using Superscript II (Invitrogen) with Oligo(dt) and for PCR using primers specific for target RNAs. The following primers were used in this study: *tubulin 67c*, forward: GGCAGCCTGAAGACCAAG GAG, and reverse: CACTGCTCTGCGATCTTCTGC; *oskar*, forward: TCCCTGGAGAACATAC-CACGAG, and reverse: GCATTTACGCTGGCTTGCTG; *bicoid*, forward: CAAGAATGACGAAAGTCCGAGTCTG, and reverse: TCGTGCATTGATATTGGTTCGATTC.
